# Supplementary material for: Near-infrared light triggered photothermal therapy and enhanced photodynamic therapy with a tumor-targeting hydrogen peroxide shuttle
Source: Royal Society of Chemistry journal article supplement (doi:10.1039/c8tb00476e), 2018-01-01
Supplement: c8tb00476e1.pdf [file c8tb00476e1.pdf]

**Supporting information**

**Near-Infrared Light Triggered Photothermal Therapy and Enhanced  
Photodynamic Therapy with a Tumor-targeting Hydrogen Peroxide Shuttle**

**Bing Wang<sup>1\*</sup>, Weiming Lin<sup>1</sup>, Zhengwei Mao<sup>2\*</sup>, Changyou Gao<sup>2</sup>**

<sup>1</sup>Department of Polymer Materials, Zhejiang Sci-Tech University, Hangzhou 310018, China

<sup>2</sup>MOE Key Laboratory of Macromolecular Synthesis and Functionalization, Department of Polymer Science and Engineering, Zhejiang University, Hangzhou 310027, China.

\* Corresponding authors: wbing388@163.com (B. W.) and zwmao@zju.edu.cn (Z. M.)

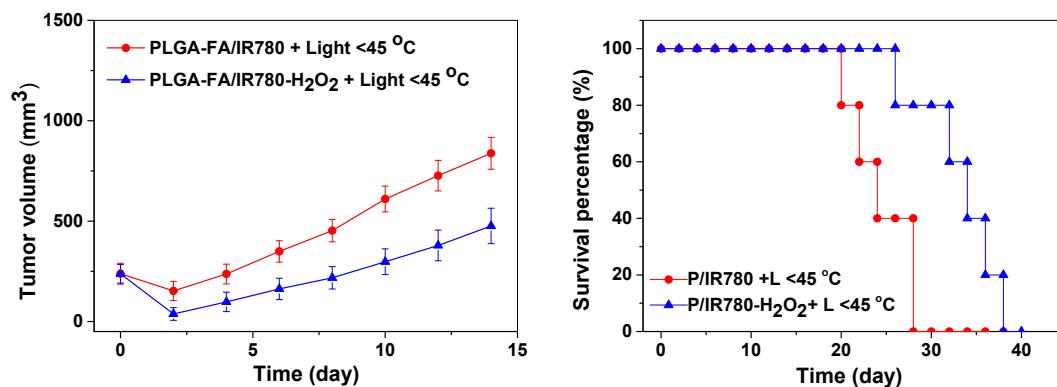

**Figure S1.** (a) Average tumor volume of the mice intravenously injected with 1) 200  $\mu$ L 5 mg/mL PLGA-FA/IR780 NPs + 6 times of 30 s laser irradiation, 2) 200  $\mu$ L 5 mg/mL PLGA-FA/IR780-H<sub>2</sub>O<sub>2</sub> NPs + 6 times of 30 s laser irradiation. (b) Kaplan-Meier plots showing the percentage of animals remaining in the study as a function of time.

In order to control the tumor temperature lower than 45 °C, an intermittent light irradiation method is applied. The tumor was irradiated with an 808 nm laser (0.5 W/cm<sup>2</sup>) for 30 s and leave in dark for another 1 min, repeated for 6 times. Overall the tumors were received 3 min irradiation in total. The temperature was about 42-44 °C.
